# Supplementary material for: Do pathologists agree with each other on the histological assessment of pT1b oesophageal adenocarcinoma?
Source: PubMed Central journal article supplement — United European Gastroenterol J. 2018 Dec 6;7(2):261–9. doi: 10.1177/2050640618817693 (PMC6498808; doi:10.1177/2050640618817693), 2018-12-06
Supplement: Supplemental_Material2.pdf [file Supplemental_Material2.pdf]

**Supplementary table 1:** Tumor characteristics of the 85 patients with a submucosal esophageal adenocarcinoma.

|                                                                  |              |
|------------------------------------------------------------------|--------------|
| Tumor location                                                   |              |
| Mid esophagus, n (%)                                             | 3 (4%)       |
| Distal esophagus, n (%)                                          | 57 (67%)     |
| Gastro-esophageal junction, n (%)                                | 19 (22%)     |
| Cardia, n (%)                                                    | 4 (5%)       |
| Unknown, n (%)                                                   | 2 (2%)       |
| Clinical tumor staging, n (%)                                    |              |
| cT - stage                                                       |              |
| cT0                                                              | 3 (4%)       |
| cT1                                                              | 9 (11%)      |
| cT2                                                              | 22 (26%)     |
| cT3                                                              | 12 (14%)     |
| cT4                                                              | 2 (2%)       |
| cTx^                                                             | 37 (44%)     |
| cN - stage                                                       |              |
| cN0                                                              | 65 (77%)     |
| cN1                                                              | 14 (17%)     |
| cNx^^                                                            | 6 (7%)       |
| cM - stage                                                       |              |
| cM0                                                              | 66 (78%)     |
| cMx^^                                                            | 19 (23%)     |
| Endoscopic tumor size before ER* median (range), mm              | 15 (5 – 35)  |
| Pathological tumor size after esophagectomy** median (range), mm | 25 (10 – 90) |

Continuous data is presented as median, range. Categorical data as n (%).

\*Endoscopic tumor size before ER is known in 23

\*\* Pathological tumor size after esophagectomy known in 47

^ after ER or unknown

^^ missing data or unknown

**Supplementary table 2:** Interobserver agreement between three GI-pathologists, for the histological assessment of pT1b EAC in 52 patients. The histological parameters were established using desmin and pankeratin double staining.

| Histological Parameter (continuous variable)  | Specimen          | n  | Observed agreement (%) | ICC   | 95% CI          |
|-----------------------------------------------|-------------------|----|------------------------|-------|-----------------|
| Submucosal invasion in $\mu\text{m}$          | D&P-IHC           | 52 | Na                     | 0.753 | (0.622 – 0.846) |
|                                               | Corresponding H&E | 52 | Na                     | 0.631 | (0.488 – 0.753) |
| Total thickness of submucosa in $\mu\text{m}$ | D&P-IHC           | 49 | Na                     | 0.683 | (0.516 – 0.793) |
|                                               | Corresponding H&E | 51 | Na                     | 0.595 | (0.429 – 0.731) |

|                                                      |                    |          |                               |                     |                 |
|------------------------------------------------------|--------------------|----------|-------------------------------|---------------------|-----------------|
|                                                      | ER - D&P-IHC       | 30       | Na                            | 0.703               | (0.531 – 0.833) |
|                                                      | Surgical - D&P-IHC | 19       | Na                            | 0.610               | (0.359 – 0.808) |
| <b>Histological Parameter (categorical variable)</b> | <b>Specimen</b>    | <b>n</b> | <b>Observed agreement (%)</b> | <b>Fleiss Kappa</b> | <b>95% CI</b>   |
| Paris classification                                 | D&P-IHC            | 52       | 75%                           | 0.464               | (0.317 – 0.611) |
|                                                      | Corresponding H&E  | 52       | 81%                           | 0.610               | (0.458 – 0.763) |
| Pragmatic classification                             | D&P-IHC            | 49       | 40%                           | 0.373               | (0.259 – 0.487) |
|                                                      | Corresponding H&E  | 51       | 42%                           | 0.346               | (0.233 – 0.459) |
| Combined histological characteristics*               | D&P-IHC            | 52       | 85%                           | 0.619               | (0.462 – 0.776) |
|                                                      | Corresponding H&E  | 52       | 87%                           | 0.655               | (0.498 – 0.812) |

D&P-IHC : desmin and pankeratin immunohistochemistry (double-staining), H&E: hematoxylin and eosin stained slides. Na: not applicable. ICC: intraclass correlation coefficient, ER: Endoscopic resection.

\* Favorable: pT1a/sm1, G1/2, and no LVI vs. Unfavorable: pTsm2/3/pT2, or G3/4, or LVI.
